# Supplementary material for: The Small Molecule Inhibitor QLT-0267 Decreases the Production of Fibrin-Induced Inflammatory Cytokines and Prevents Post-Surgical Peritoneal Adhesions
Source: PubMed Central journal article supplement (PMC6013455; doi:10.1038/s41598-018-25994-5), 2018-06-21

**The Small Molecule Inhibitor QLT-0267 Decreases the Production of Fibrin-Induced Inflammatory Cytokines and Prevents Post-Surgical Peritoneal Adhesions**

Cheng-Chung Fang, Tzung-Hsin Chou, Jenq-Wen Huang, Chien-Chang Lee, Shyr-Chyr Chen

**Supplementary Table S1. RT-PCR primers**

| Primers       |           | Sequences                         | product (bp) |
|---------------|-----------|-----------------------------------|--------------|
| IL-6          | sense     | 5'-GAGGATACCACCCACACCAGACCAGTA-3' | 525          |
|               | antisense | 5'-GGTTTGCCGAGTAGACCTCATAGTGAC-3' |              |
| IL-1 $\beta$  | sense     | 5'-GGGATGATGACGACCTGCTA-3'        | 192          |
|               | antisense | 5'-TGTCGTTGCTTGTCTCTCCT-3'        |              |
| TNF $\alpha$  | sense     | 5'-GAAACACACGAGACGCTGAA-3'        | 400          |
|               | antisense | 5'-CCTGAAGACAGCTTCCCAAC-3'        |              |
| VEGF-A        | sense     | 5'-AGACCTCTCACCGGAAAGAC-3'        | 445          |
|               | antisense | 5'-ACTCAAGTCCACAGCAGTCA-3'        |              |
| TGF $\beta$ 1 | sense     | 5'-CCTGCAAGACCATCGACATG-3'        | 337          |
|               | antisense | 5'-ACTGCTTCCCGAATGTCTGA-3'        |              |
| VEGF-C        | sense     | 5'-CTGTGGACCCAACAAGGAGT-3'        | 243          |
|               | antisense | 5'-CAGGCACATTTTCCAGGATT-3'        |              |
| GAPDH         | sense     | 5'-AGACAGCCGCATCTTCTTGT-3'        | 239          |
|               | antisense | 5'-TTCCATTCTCAGCCTTGAC-3'         |              |

**Supplementary Table S2. Quantitative Real-Time PCR primers**

| Primers      |           | Sequences                    |
|--------------|-----------|------------------------------|
| IL-6         | sense     | 5'-CCAGCCAGTTGCCTTCTT-3'     |
|              | antisense | 5'-AATTAAGCCTCCGACTTGTGAA-3' |
| IL-1 $\beta$ | sense     | 5'-TCATTGTGGCTGTGGAGAAG-3'   |
|              | antisense | 5'-CACTAGCAGGTCGTCATCATC-3'  |
| TNF $\alpha$ | sense     | 5'-CGTGTTTCATCCGTTCTCTACC-3' |
|              | antisense | 5'-GCCACTACTTCAGCGTCTC-3'    |
| VEGF-A       | sense     | 5'-GCGGATCAAACCTCACCAA-3'    |
|              | antisense | 5'-CTTGGCTTGTCACATTTTTC-3'   |
| ILK          | sense     | 5'-ACAGACGCTCAGCAGACA-3'     |
|              | antisense | 5'-GCCACCTTCATTCCAATCTCC-3'  |
| 18S          | sense     | 5'-GGAGAGGGAGCCTGAGAAAC-3'   |
|              | antisense | 5'-CCTCCAATGGATCCTCGTTA-3'   |

**Supplementary Table S3. Gross adhesion scoring system**

| <b>Strength</b>                     | <b>Score</b> | <b>Total area (cm<sup>2</sup>)</b> | <b>Score</b> |
|-------------------------------------|--------------|------------------------------------|--------------|
| No adhesions                        | 0            | No adhesions                       | 0            |
| Thin                                | 1            | < 0.5                              | 1            |
| One definite localized adhesions    | 2            | 0.5 ~ 0.99                         | 2            |
| Two definite localized adhesions    | 3            | 1 ~ 1.49                           | 3            |
| Three definite localized adhesions  | 4            | 1.5 ~ 1.99                         | 4            |
| > four definite localized adhesions | 5            | > 2                                | 5            |

**Supplementary Figure 1S.** The immunofluorescence stains of rat peritoneal mesothelial cells (PMCs). The cell markers of PMCs were simultaneously stained by (A) cytokeratin-18 antibody and (B)  $\alpha$ -smooth muscle actin antibody, and (C) the nuclei were stained by 4',6-diamidino-2-phenylindole (DAPI).

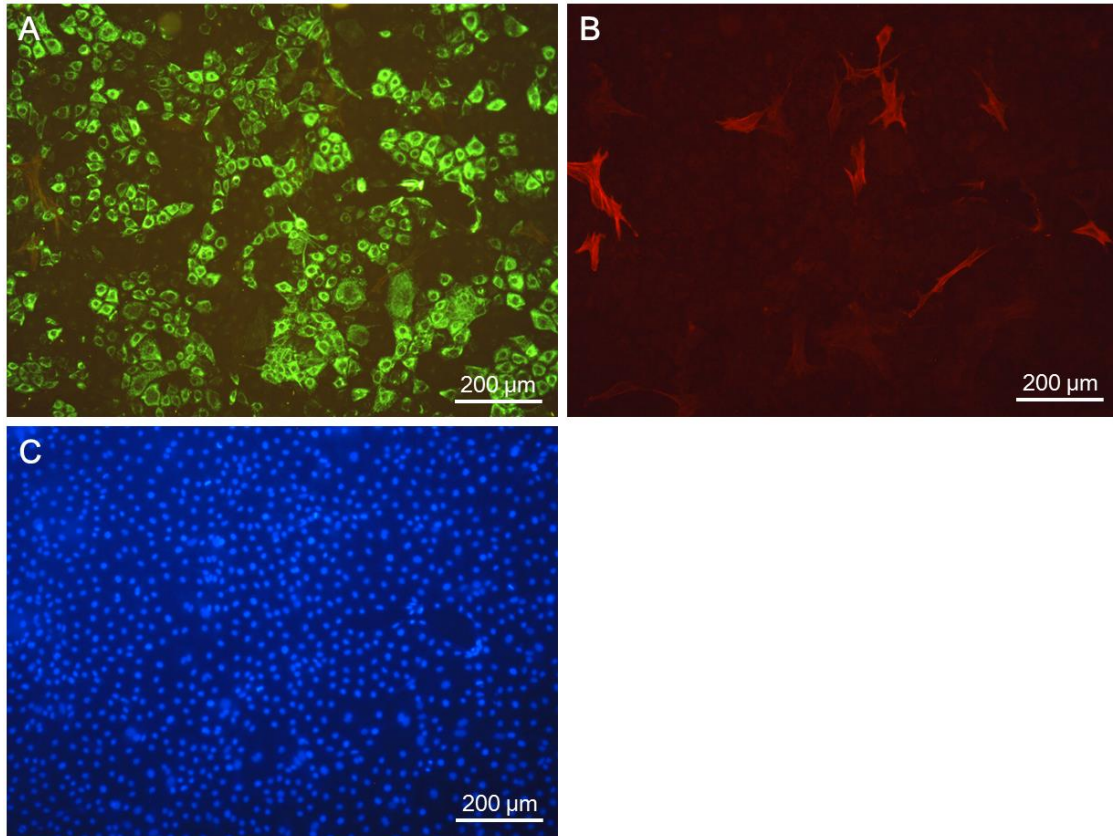

**Supplementary Figure 2S.** The histology of mice tissue stained by haematoxylin and eosin. The mice tissue sections were displayed in (A) sham operation, (B) 1 hour after operation, (C) 4 hours after operation, (D) 1 day after operation, and (E) 7 days after operation. There were fibrin depositions on the parietal peritoneum after gauze injury at 1 and 2 hours post operation. The adhesion between abdominal wall and intestinal wall consisted of fibrin and leukocytes one day after operation. The adhesion between abdominal wall and intestinal wall consisted of collagen fibers, fibroblasts, capillaries and mononuclear cells 7 days after operation.

SK: skeletal muscle; SM: smooth muscle; Arrow: adhesion between abdominal wall and intestinal wall.

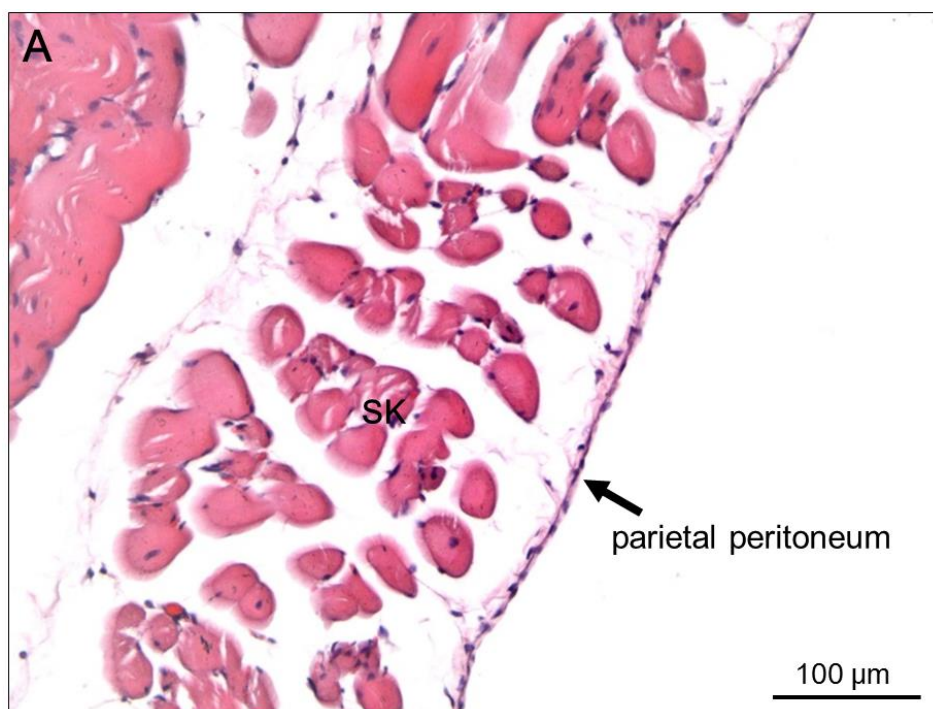

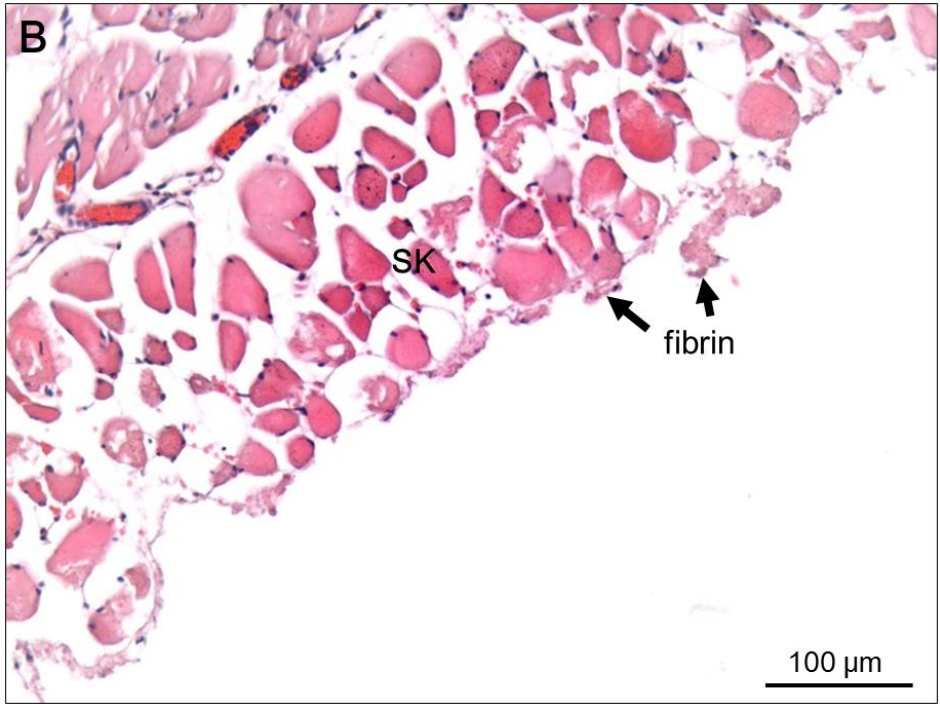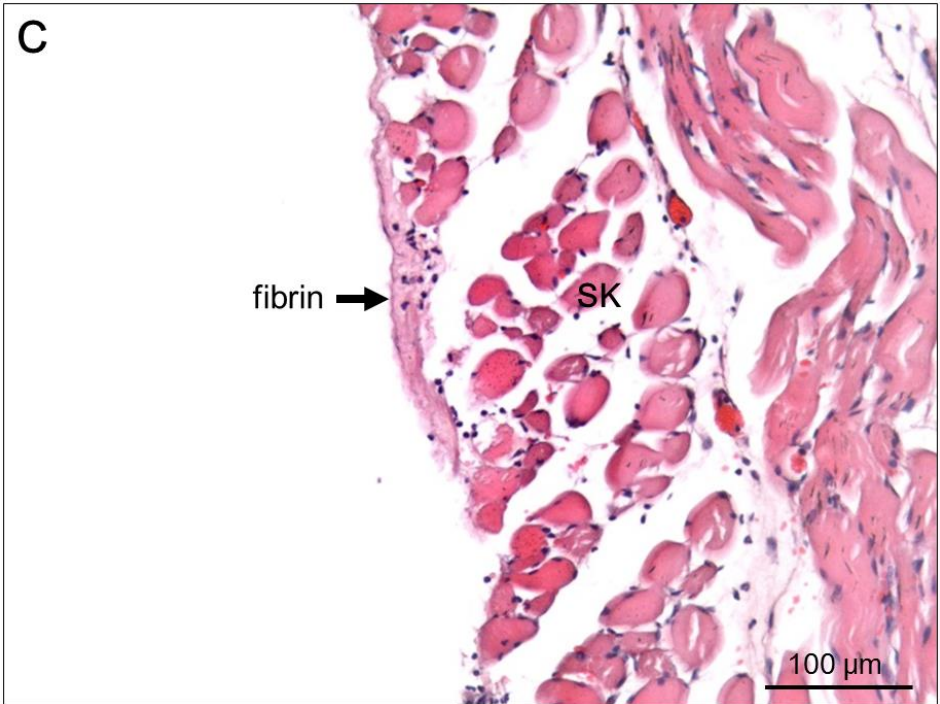



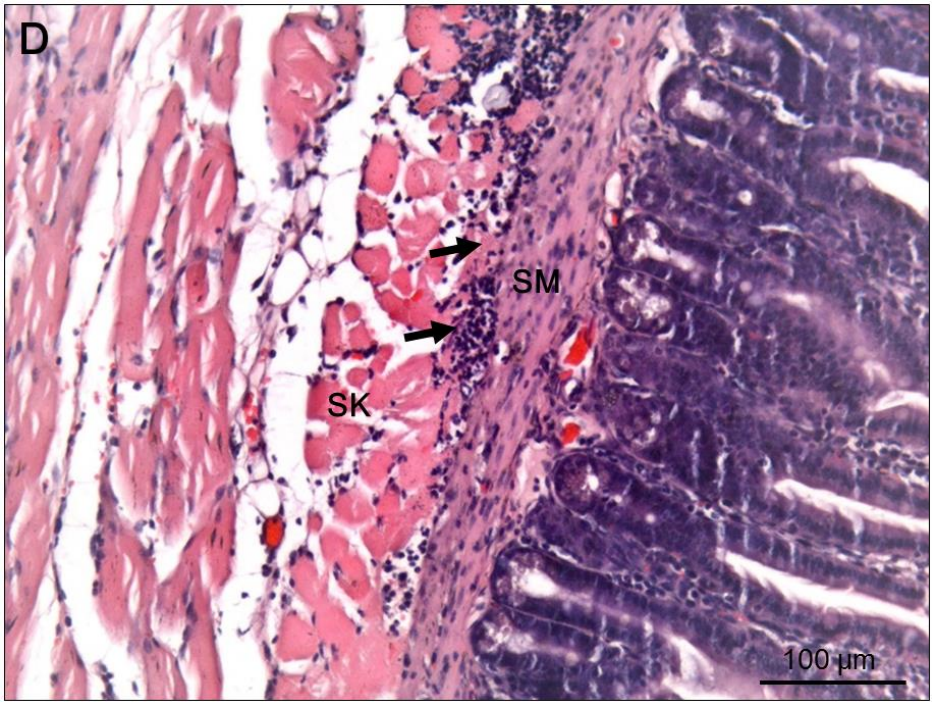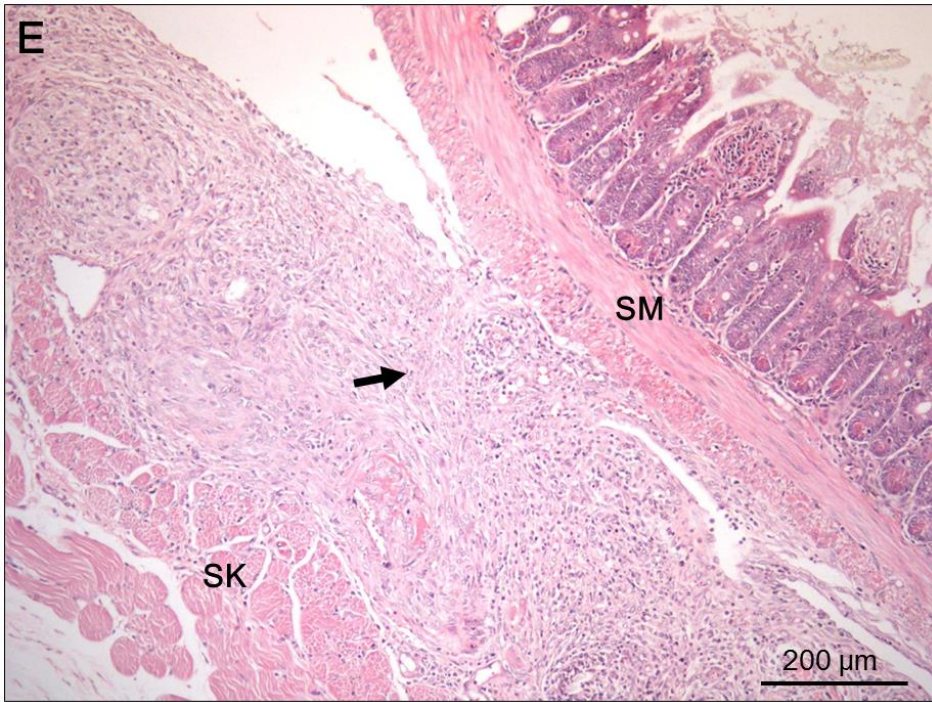



**Supplementary Figure 3S.** Examples of gross appearance in abdominal cavity 7 days after operation. There were no adhesions in Group 1 mice (sham operation, A). The adhesions (arrow) were formed after parietal peritoneum were injured by gauze in Group 2 mice (operation, B) and Group 3 mice (operation with 10 mg/kg QLT-0267 treatment, C).

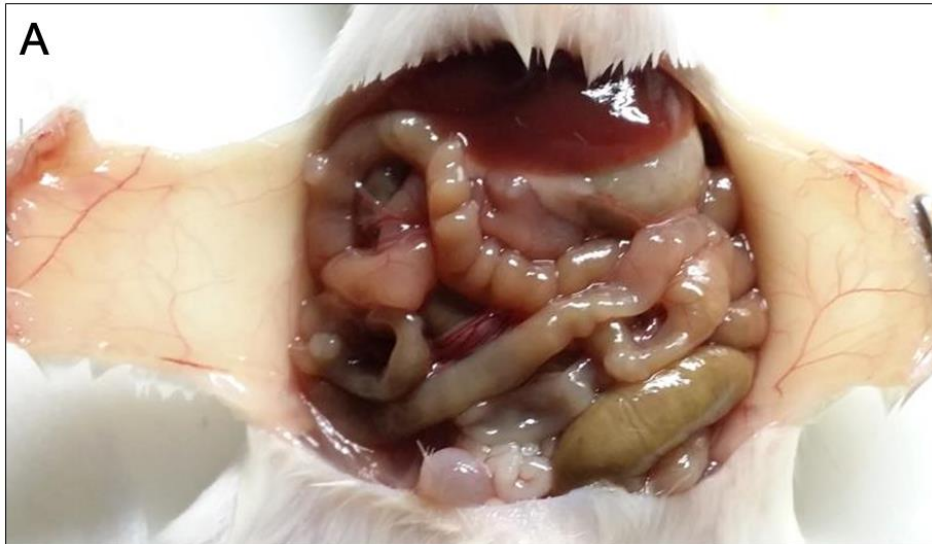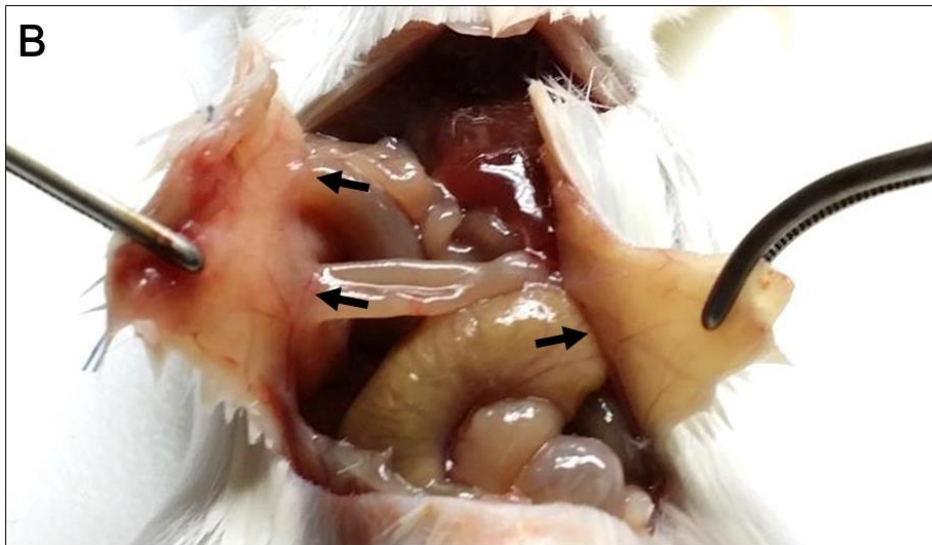

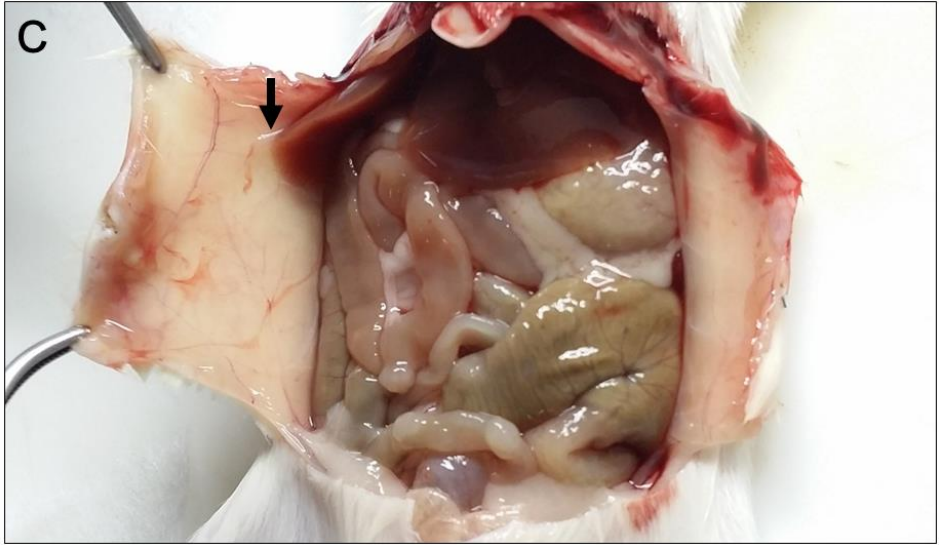

**Supplementary Figure 4S.** Original full-length gel images of RT-PCR. Lane 2 was treated with 10 mg/ml of bovine serum albumin (BSA) to be a negative control to fibrin. However, we found that BSA was not a negative control due to contamination by fibrinogen. Therefore, we removed the BSA lanes in Figure 1. The data of 6-hr results were omitted in Figure 1 for easy reading. Lane 1: untreated; lane 2: BSA; lane 3: fibrin; lane 4: fibrin + 2  $\mu$ M QLT-0267; lane 5: fibrin + 5  $\mu$ M QLT-0267; lane 6: fibrin + 10  $\mu$ M QLT-0267.

**Fig. 1A - IL-6**

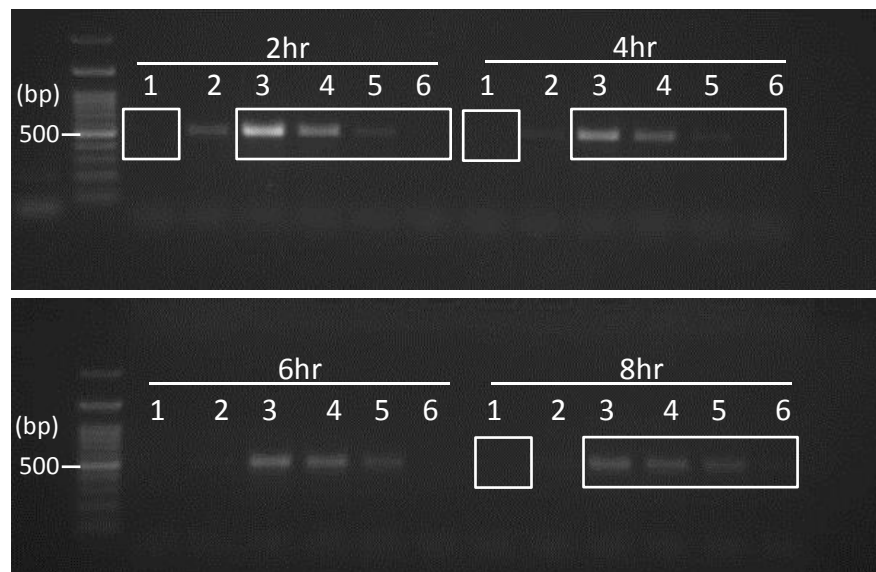

**Fig. 1A - IL-1**

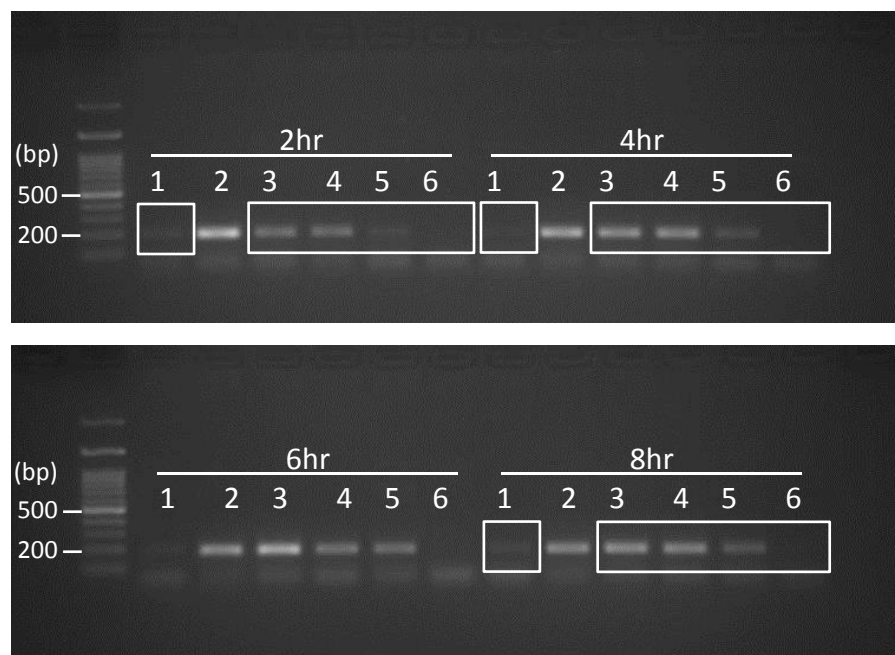

**Fig. 1A - TNF $\alpha$**

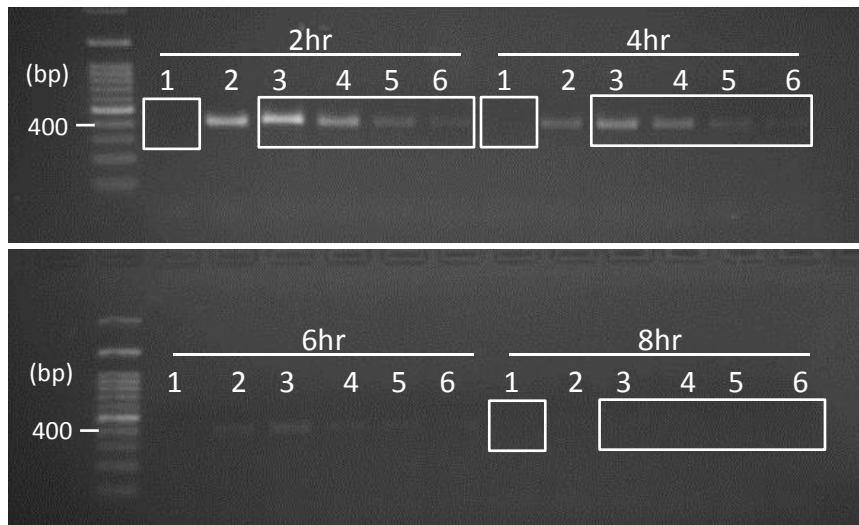

**Fig. 1A - VEGF-A**

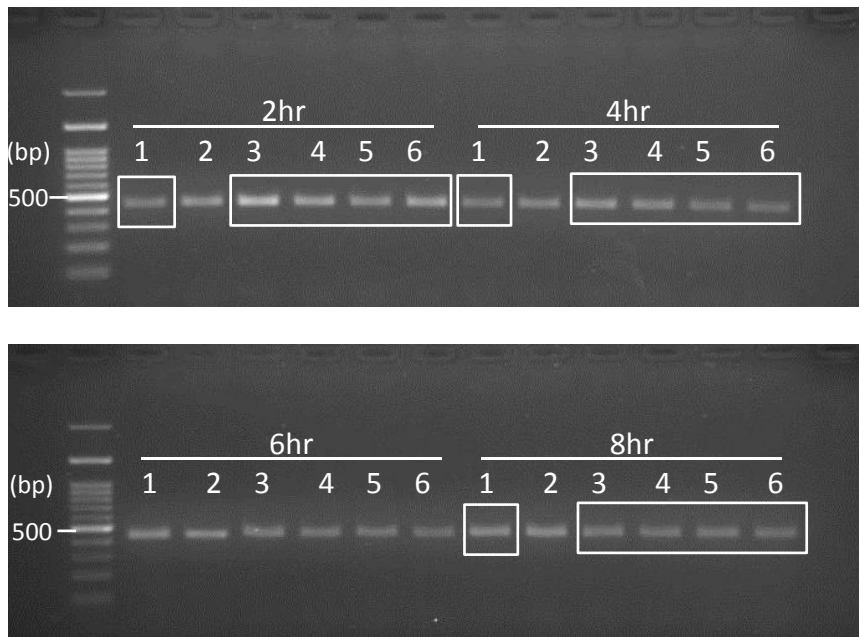

**Fig. 1A - TGF $\beta$ 1**

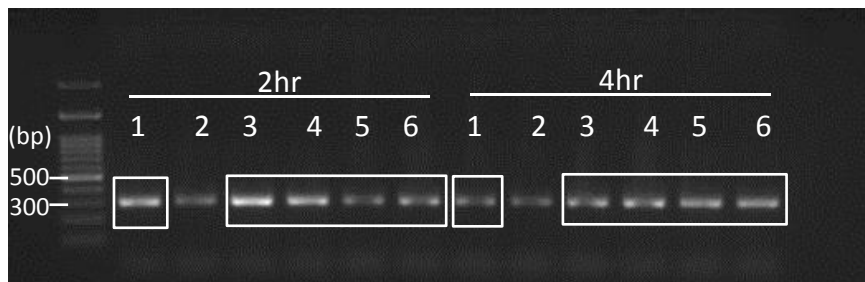

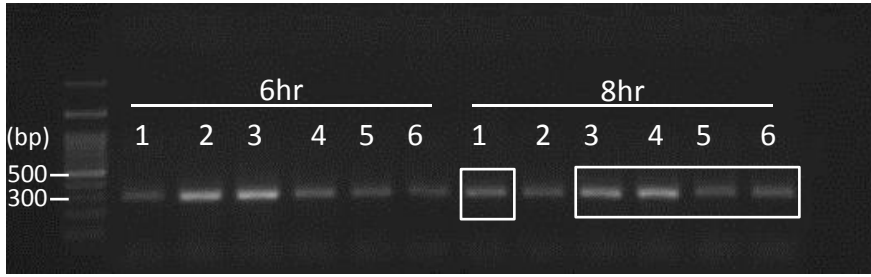

**Fig. 1A - VEGF-C**

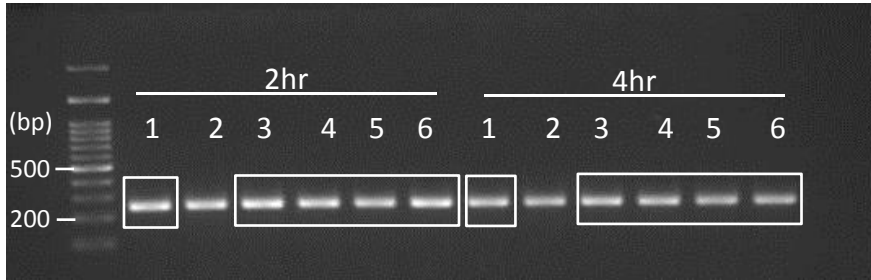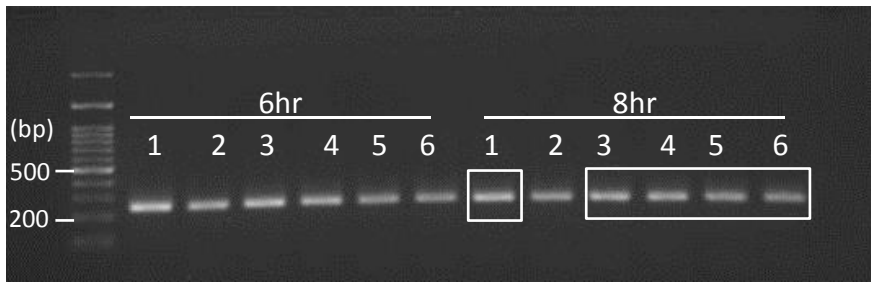

**Fig. 1A - GAPDH**

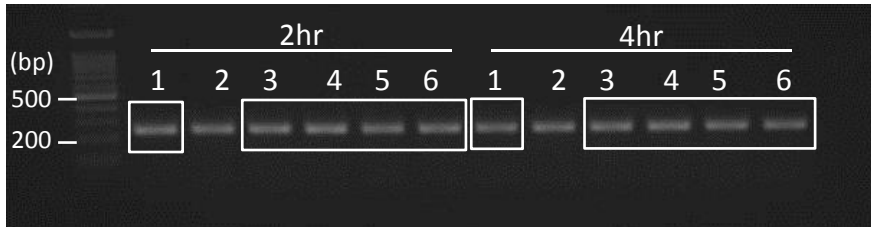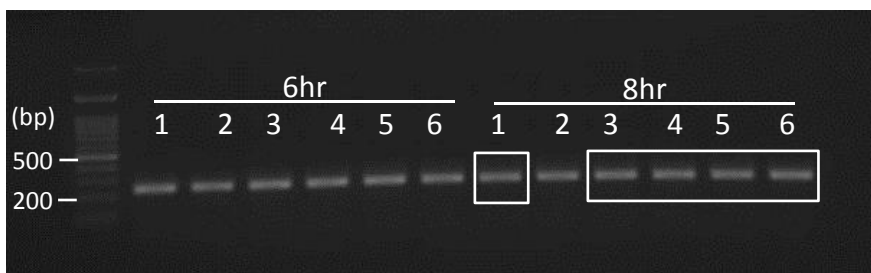

**Supplementary Figure 5S.** Western blots of cell markers in fibrin-covered rat peritoneal mesothelial cells (PMCs). PMCs were overlaid with fibrin via incubation with a fibrinogen and thrombin mixture for 0, 1, 4 and 8 hr. The effects of fibrin with/without QLT-0267 treatment on the expression of cell markers were examined by Western blotting. The fibronectin,  $\alpha$ v integrin, snail and  $\alpha$ -smooth muscle actin ( $\alpha$ -SMA) did not increase significantly after fibrin treatment, and cytokeratin-18 (CK-18) did not decrease significantly after fibrin treatment.

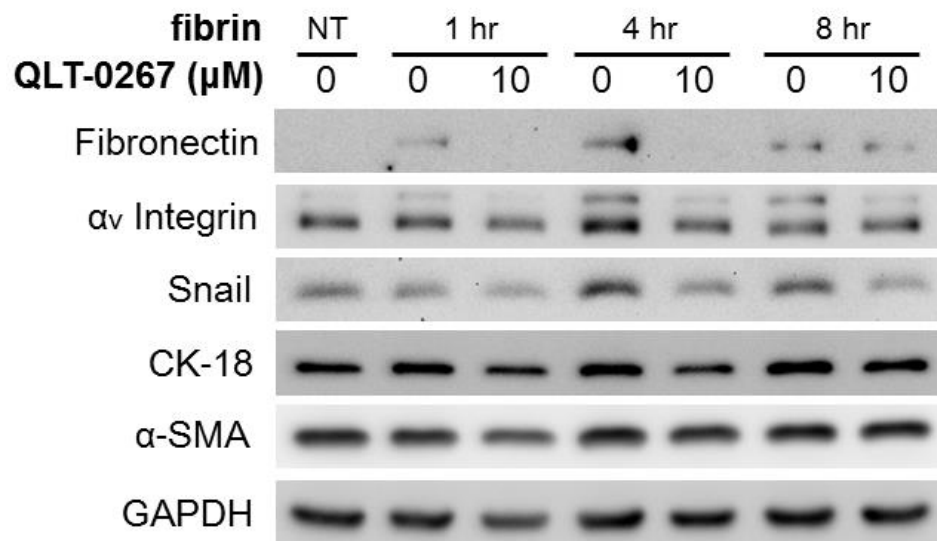



**Supplementary Figure 6S.** Unprocessed original images of western blots.

Groups of figure 2:

Lane 1: untreated; lane 2: 1-hr fibrin; lane 3: 1-hr fibrin + 10  $\mu$ M QLT-0267;  
lane 4: 2-hr fibrin; lane 5: 2-hr fibrin + 10  $\mu$ M QLT-0267.

Related to fig. 2A

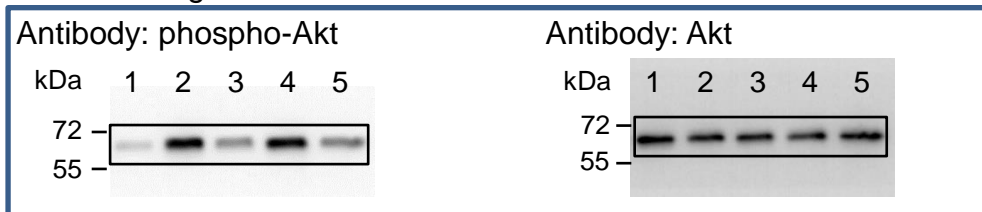

Related to fig. 2B

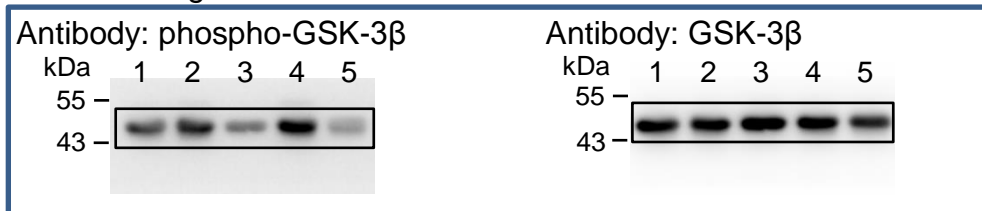

Related to fig. 2C

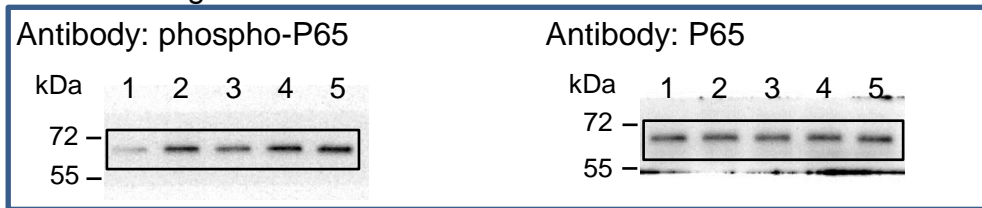

Related to fig. 2D

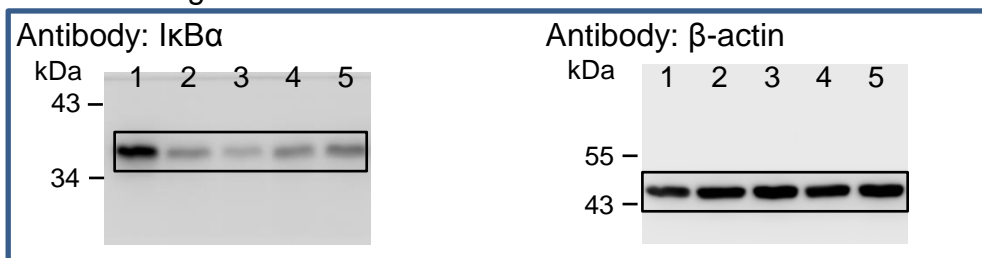

Groups of figure 4:

Lane 1: empty vector (EV) control; lane 2: shILK; lane 3: EV + 1-hr fibrin; lane 4: shILK + 1-hr fibrin; lane 5: EV + 2-hr fibrin; lane 6: shILK + 2-hr fibrin.

Related to fig. 4A

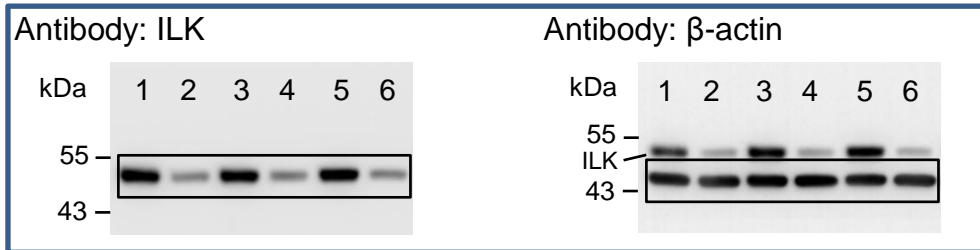

Related to fig. 4B

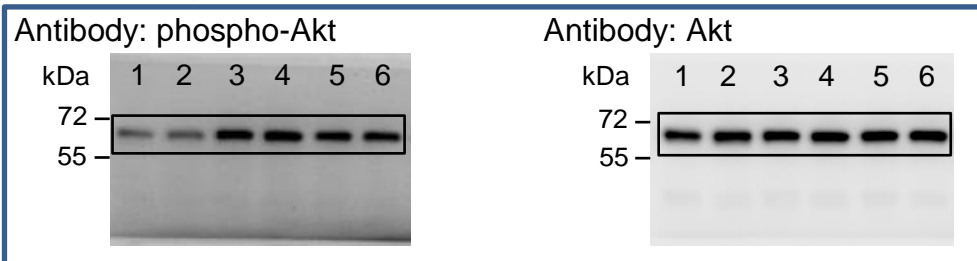

Related to fig. 4C

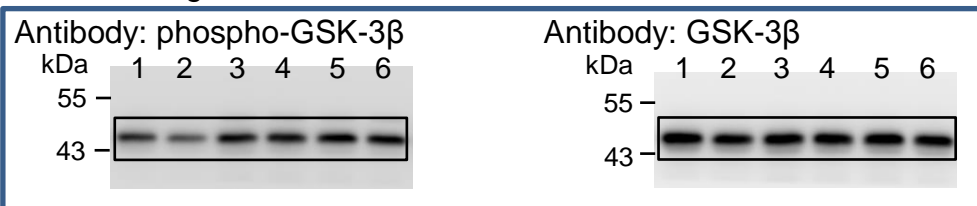

Related to fig. 4D

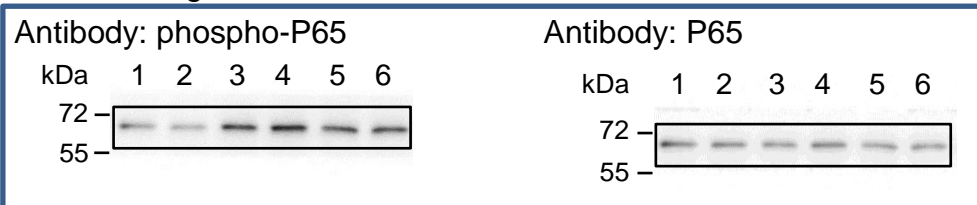

Related to fig. 4E

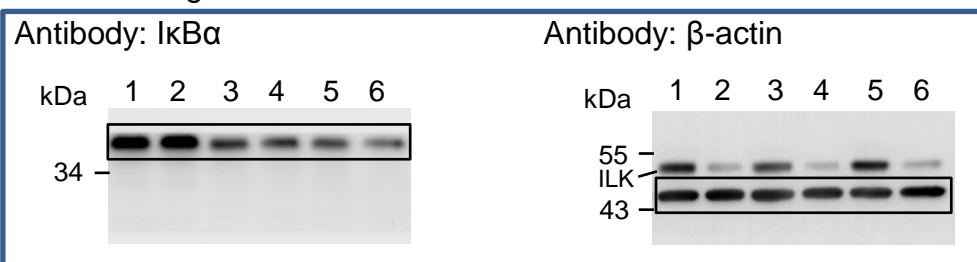

Groups of figure 5A:

Lane 1: untreated; lane 2: 1-hr fibrin; lane 3: 1-hr fibrin + 10  $\mu$ M QLT-0267;  
lane 4: 2-hr fibrin; lane 5: 2-hr fibrin + 10  $\mu$ M QLT-0267.

Related to fig. 5A

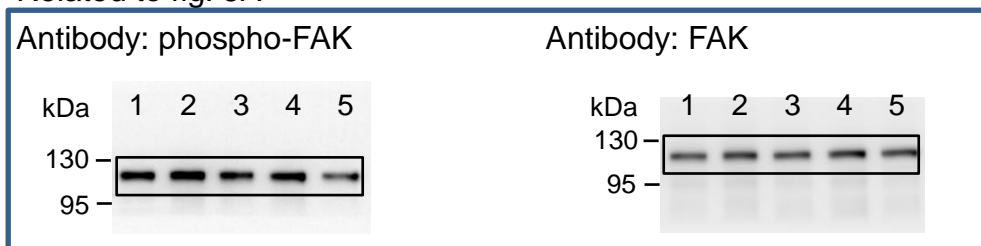

Groups of figure 5B:

Lane 1: empty vector (EV) control; lane 2: shILK; lane 3: EV + 1-hr fibrin;  
lane 4: shILK + 1-hr fibrin; lane 5: EV + 2-hr fibrin; lane 6: shILK + 2-hr fibrin.

Related to fig. 5B

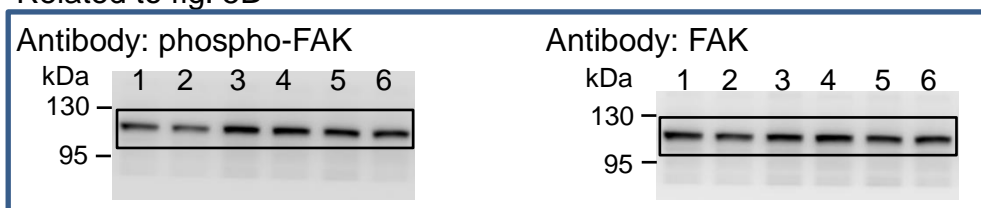

Groups of figure 6:

Lane 1: untreated; lane 2: 2  $\mu$ M SB216763; lane 3: 1-hr fibrin; lane 4: 1-hr fibrin  
+ 2  $\mu$ M SB216763.

Related to fig. 6A

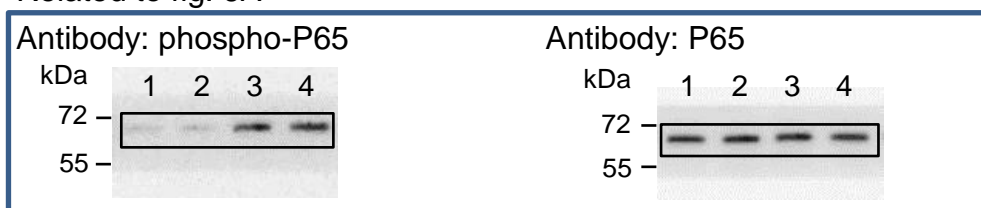

Related to fig. 6B

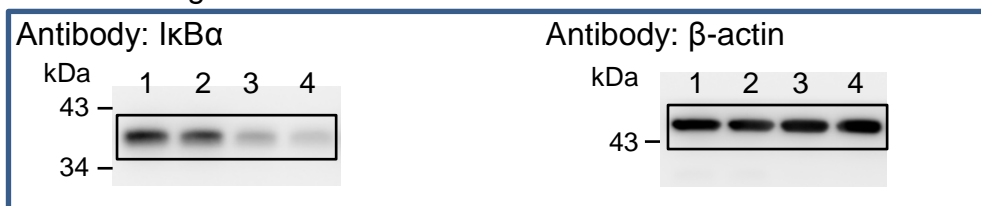

Groups of supplementary figure 5S:

Lane 1: untreated; lane 2: 1-hr fibrin; lane 3: 1-hr fibrin + 10  $\mu$ M QLT-0267;  
lane 4: 4-hr fibrin; lane 5: 4-hr fibrin + 10  $\mu$ M QLT-0267; lane 6: 8-hr fibrin;  
lane 7: 8-hr fibrin + 10  $\mu$ M QLT-0267.

Related to supplementary fig. 5S

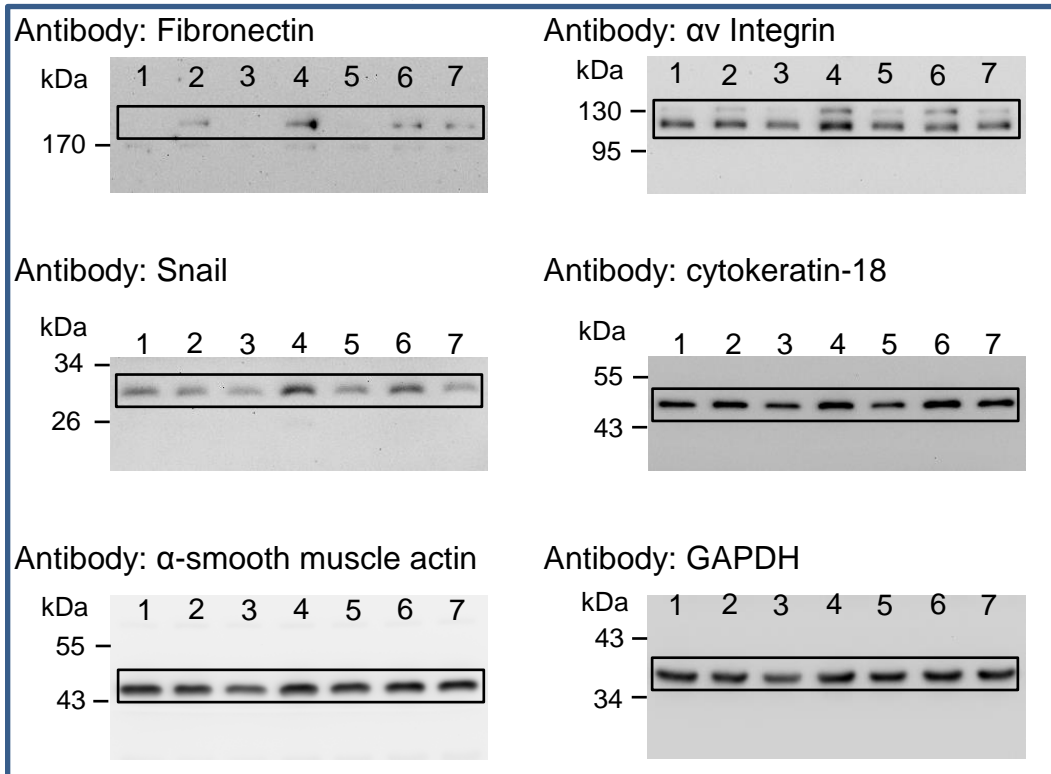

Supplement: 41598_2018_25994_MOESM1_ESM.pdf [file 41598_2018_25994_MOESM1_ESM.pdf]
